# Supplementary material
Source: PubMed Central journal article supplement (PMC6248410)
Supplement: wxy055_suppl_supplementary_material.pdf [file wxy055_suppl_supplementary_material.pdf]

## Online Supplementary Material

### **Exposures to Volatile Organic Compounds among Healthcare Workers: Modeling the Effects of Cleaning Tasks and Product-Use**

Feng-Chiao Su<sup>1</sup>, Melissa C. Friesen<sup>2</sup>, Aleksandr B. Stefaniak<sup>1</sup>, Paul K. Henneberger<sup>1</sup>, Ryan F. LeBouf<sup>1</sup>, Marcia L. Stanton<sup>1</sup>, Xiaoming Liang<sup>1</sup>, Michael Humann<sup>1</sup>, M. Abbas Virji<sup>1\*</sup>

<sup>1</sup>Respiratory Health Division, National Institute for Occupational Safety and Health (NIOSH), Centers for Disease Control and Prevention (CDC), Morgantown, WV

<sup>2</sup> Occupational and Environmental Epidemiology Branch, Division of Cancer Epidemiology and Genetics, National Cancer Institute, Bethesda, MD

\* Correspondence to: M. Abbas Virji, ScD, CIH, 1095 Willowdale Road, Morgantown, WV 26505. Email: MVirji@cdc.gov

Supplemental Table 1. Total VOCs and selected cleaning-related VOC exposures, tasks and chemical ingredients in products used by occupation.

| Occupation (n)                     | A/P | VOC Concentrations in ppb (GM, GSD) |            |            |            |                  |                    |            |            | Average time on predominant Tasks and Product Ingredient/Composition per work shift in minutes                                                                                                                                                                                                                                                                    |
|------------------------------------|-----|-------------------------------------|------------|------------|------------|------------------|--------------------|------------|------------|-------------------------------------------------------------------------------------------------------------------------------------------------------------------------------------------------------------------------------------------------------------------------------------------------------------------------------------------------------------------|
|                                    |     | Ethanol                             | Acetone    | 2-Propanol | Chloroform | $\alpha$ -Pinene | <i>d</i> -Limonene | TVOC11     | TVOC14     |                                                                                                                                                                                                                                                                                                                                                                   |
| Clinical laboratory technician (8) | A   | 82.7, 20.0                          | 32.5, 7.67 | 20.2, 43.6 | 0.04, 1.22 | 0.15, 1.00       | 1.22, 1.46         | 13.1, 6.12 | 480, 3.83  | <b>Composition:</b> aldehyde=15.6; aromatic=15.6                                                                                                                                                                                                                                                                                                                  |
|                                    | P   | 269, 4.32                           | 70.6, 3.35 | 82.5, 1.93 | 0.09, 1.00 | 0.04, 1.00       | 0.38, 2.92         | 126, 10.8  | 873, 4.99  |                                                                                                                                                                                                                                                                                                                                                                   |
| Nursing assistant (8)              | A   | 1037, 3.10                          | 21.3, 1.74 | 671, 1.51  | 0.12, 2.26 | 0.14, 1.54       | 1.28, 2.97         | 4.52, 1.60 | 1973, 1.94 | <b>Tasks:</b> bathe patient=30.6; <b>Composition:</b> alcohol=36.3; alkane=24.4; amide=8.75; ester=8.75; halogenated=24.4                                                                                                                                                                                                                                         |
|                                    | P   | 2594, 2.72                          | 40.8, 1.65 | 1194, 1.71 | 0.34, 3.21 | 0.16, 5.27       | 1.57, 3.91         | 15.0, 2.30 | 4367, 1.89 |                                                                                                                                                                                                                                                                                                                                                                   |
| Dental assistant (4)               | A   | 2.31, 254                           | 17.9, 1.64 | 3667, 1.50 | 0.09, 1.89 | 0.15, 1.00       | 1.00, 1.53         | 16.6, 2.06 | 3809, 1.54 | <b>Tasks:</b> cleaning=33.8; <b>Composition:</b> alcohol=36.3; glycolethers=35.0; quats=35.0                                                                                                                                                                                                                                                                      |
|                                    | P   | 1.54, 253                           | 23.0, 1.74 | 1097, 9.36 | 0.09, 1.00 | 0.04, 1.00       | 0.16, 2.68         | 10.7, 2.28 | 1565, 5.52 |                                                                                                                                                                                                                                                                                                                                                                   |
| Dental laboratory technician (4)   | A   | 148, 1.11                           | 12.4, 1.26 | 558, 1.31  | 0.07, 1.97 | 0.15, 1.00       | 1.71, 1.15         | 7.62, 2.38 | 729, 1.27  | <b>Tasks:</b> pour mix products=12.5; <b>Composition:</b> acrylate=7.50; alcohol=38.8                                                                                                                                                                                                                                                                             |
|                                    | P   | 105, 3.58                           | 18.5, 2.07 | 53.7, 4.68 | 0.09, 1.00 | 0.04, 1.00       | 0.19, 3.30         | 3.92, 2.20 | 225, 2.86  |                                                                                                                                                                                                                                                                                                                                                                   |
| Endoscopy technician (11)          | A   | 36.2, 53.8                          | 12.7, 1.54 | 260, 62.4  | 0.12, 2.47 | 0.15, 1.00       | 0.51, 2.62         | 3.24, 1.63 | 783, 6.25  | <b>Tasks:</b> sterile and disinfect=34.1; wash equipment=32.3; scope cleaning=19.1; cleaning=14.5; tear down equipment=11.8; prepare procedure room=10.0; <b>Composition:</b> acid=40.0; alcohol=73.2; aldehyde=5.0; amide=27.7; amine=72.7; base=14.1; carboxylic acid=18.6; enzyme=40.5; ether=27.7; oxidizers=18.6; phenolics=14.1; salt=14.1; surfactant=14.5 |
|                                    | P   | 113, 7.68                           | 34.6, 2.42 | 241, 8.40  | 0.18, 3.94 | 0.05, 2.75       | 0.12, 4.44         | 8.66, 5.93 | 577, 5.60  |                                                                                                                                                                                                                                                                                                                                                                   |
| Floor stripper/waxer (13)          | A   | 319, 4.18                           | 27.7, 2.72 | 546, 4.01  | 0.17, 1.57 | 0.19, 2.50       | 2.15, 7.16         | 13.5, 3.01 | 991, 3.68  | <b>Tasks:</b> buff floor=46.2; mop floor=33.1; floor strip=12.3; <b>Composition:</b> acid=9.62; acrylate=5.38; alcohol=15.0; alkane=10.4; amine=52.7; ammonia=11.2; aromatic=21.2; base=21.2; ester=11.2; ether=26.2; fragrance=8.85; glycolethers=76.2; surfactant=8.85                                                                                          |
|                                    | P   | 636, 3.25                           | 41.6, 1.54 | 707, 5.27  | 0.17, 1.77 | 0.06, 3.00       | 0.79, 14.1         | 23.0, 2.64 | 1589, 3.69 |                                                                                                                                                                                                                                                                                                                                                                   |
| Housekeeper (31)                   | A   | 700, 2.73                           | 19.8, 1.58 | 647, 2.77  | 0.19, 1.75 | 0.14, 1.82       | 2.02, 3.14         | 6.06, 1.92 | 1519, 2.25 | <b>Tasks:</b> cleaning=65.8; mop floor=56.6; clean bathroom=18.9; clean window=6.45; <b>Composition:</b> acid=11.5; alcohol=123; amide=15.6; amine=67.4; base=53.2; bleach=6.13; carboxylic acid=55.5; ether=79.2; fragrance=21.1; glycolethers=8.06; phenolics=8.87; quats=114; salt=77.9; surfactant=15.0; terpene=43.7                                         |
|                                    | P   | 783, 1.99                           | 47.4, 1.52 | 529, 3.33  | 0.22, 2.29 | 0.06, 2.34       | 1.09, 4.34         | 16.1, 2.53 | 1605, 1.91 |                                                                                                                                                                                                                                                                                                                                                                   |
| Licensed practical nurse (5)       | A   | 2241, 1.89                          | 24.4, 1.54 | 777, 1.42  | 0.22, 2.16 | 0.15, 1.56       | 2.66, 2.57         | 6.36, 1.51 | 3171, 1.61 | <b>Tasks:</b> bathe patient=6.00                                                                                                                                                                                                                                                                                                                                  |
|                                    | P   | 2199, 7.23                          | 54.3, 3.65 | 695, 4.29  | 0.57, 4.03 | 0.09, 7.69       | 1.08, 6.26         | 30.2, 3.06 | 4319, 2.98 |                                                                                                                                                                                                                                                                                                                                                                   |
| Medical appliance technician (2)   | A   | 179, 1.17                           | 30.2, 2.77 | 217, 1.70  | 0.08, 1.44 | 0.14, 1.16       | 12.2, 1.53         | 16.0, 1.54 | 448, 1.50  | <b>Tasks:</b> pour mix products=22.5                                                                                                                                                                                                                                                                                                                              |
|                                    | P   | 144, 1.03                           | 33.1, 1.17 | 177, 1.25  | 0.18, 2.81 | 0.04, 1.00       | 4.23, 1.13         | 53.7, 1.33 | 411, 1.06  |                                                                                                                                                                                                                                                                                                                                                                   |
| Medical equipment preparer (7)     | A   | 9.25, 71.6                          | 10.0, 1.22 | 662, 7.27  | 0.09, 2.25 | 0.15, 1.00       | 1.08, 2.38         | 4.00, 1.50 | 995, 4.36  | <b>Tasks:</b> wash equipment=83.6; cleaning=57.9; <b>Composition:</b> alcohol=80.7; alkane=9.29; amine=37.9; carboxylic acid=8.57; enzyme=38.6; oxidizers=8.57; phenolics=22.9; quats=32.1; salt=22.9; surfactant=61.4                                                                                                                                            |
|                                    | P   | 6.70, 76.6                          | 42.1, 4.89 | 1310, 13.6 | 0.21, 3.80 | 0.07, 3.65       | 2.41, 40.6         | 31.4, 4.99 | 2142, 9.01 |                                                                                                                                                                                                                                                                                                                                                                   |
| Pharmacist/pharmacy technician (6) | A   | 68.7, 62.4                          | 24.4, 1.26 | 135, 304   | 0.16, 1.96 | 0.17, 1.93       | 2.05, 2.45         | 18.5, 2.09 | 1885, 3.23 | <b>Composition:</b> alcohol=13.3                                                                                                                                                                                                                                                                                                                                  |
|                                    | P   | 97.7, 18.7                          | 31.3, 2.71 | 194, 35.6  | 0.10, 1.44 | 0.04, 1.00       | 0.38, 4.17         | 9.73, 3.47 | 1955, 6.00 |                                                                                                                                                                                                                                                                                                                                                                   |
| Registered nurse (34)              | A   | 396, 14.1                           | 18.7, 2.28 | 201, 42.9  | 0.16, 2.37 | 0.15, 1.66       | 1.00, 2.41         | 4.82, 2.37 | 1323, 2.90 | <b>Tasks:</b> prepare procedure room=6.03; tear down equipment=5.00; <b>Composition:</b> acrylate=10.4; alcohol=37.1; amide=7.94; carboxylic acid=5.00; ester=5.15; ether=5.29; quats=15.9; salt=23.7                                                                                                                                                             |
|                                    | P   | 1063, 3.77                          | 30.9, 1.51 | 288, 18.4  | 0.18, 2.37 | 0.04, 2.10       | 0.28, 6.27         | 6.30, 2.38 | 1950, 2.79 |                                                                                                                                                                                                                                                                                                                                                                   |
| Respiratory therapist (8)          | A   | 403, 2.91                           | 12.5, 1.48 | 49.1, 64.2 | 0.08, 1.75 | 0.19, 2.14       | 0.76, 1.27         | 6.57, 1.74 | 646, 2.41  | <b>Composition:</b> alcohol=12.5; glycolethers=6.88; halogenated=35.0; salt=32.5                                                                                                                                                                                                                                                                                  |
|                                    | P   | 522, 13.3                           | 41.7, 5.54 | 20.1, 47.7 | 0.13, 3.11 | 0.05, 2.15       | 0.16, 3.20         | 15.7, 4.18 | 2120, 3.84 |                                                                                                                                                                                                                                                                                                                                                                   |
| Surgical technologist (2)          | A   | 237, 1.53                           | 14.7, 1.21 | 459, 4.54  | 0.08, 2.78 | 0.15, 1.00       | 0.37, 1.59         | 2.29, 1.01 | 767, 3.01  | <b>Tasks:</b> hand wash=12.5; cleaning=5.00; tear down equipment=5.00; <b>Composition:</b> enzyme=5.00; phenolics=12.5                                                                                                                                                                                                                                            |
|                                    | P   | 547, 4.15                           | 30.2, 1.06 | 438, 3.60  | 0.11, 1.34 | 0.04, 1.00       | 0.50, 1.14         | 32.3, 1.44 | 1087, 3.50 |                                                                                                                                                                                                                                                                                                                                                                   |

A/P, mobile area/personal VOCs; VOC, volatile organic compound; TVOC14, total 14 volatile organic compounds; TVOC11, excludes 3 most dominant compounds (ethanol, acetone and 2-propanol); GM, geometric mean; GSD, geometric standard deviation.

Supplemental Table 2. Results of simple linear mixed-effect models for selected and total VOCs and product-use groups.

| Variable*                          | Count | Ethanol      |             |              | Acetone      |             |              | 2-Propanol   |             |              | Chloroform  |             |              | α-Pinene     |             |              | d-Limonene   |             |              | TVOC14       |             |              | TVOC11       |             |              |
|------------------------------------|-------|--------------|-------------|--------------|--------------|-------------|--------------|--------------|-------------|--------------|-------------|-------------|--------------|--------------|-------------|--------------|--------------|-------------|--------------|--------------|-------------|--------------|--------------|-------------|--------------|
|                                    |       | β            | SE          | % Δ          | β            | SE          | % Δ          | β            | SE          | % Δ          | β           | SE          | % Δ          | β            | SE          | % Δ          | β            | SE          | % Δ          | β            | SE          | % Δ          | β            | SE          | % Δ          |
| <b>Personal</b>                    |       |              |             |              |              |             |              |              |             |              |             |             |              |              |             |              |              |             |              |              |             |              |              |             |              |
| Alcohol-based skin preparation     | 26    | 0.26         | 0.52        | 29.2         | <b>0.17</b>  | <b>0.07</b> | <b>18.1</b>  | 0.82         | 0.52        | 127          | 0.07        | 0.19        | 7.12         | <b>0.44</b>  | <b>0.20</b> | <b>55.9</b>  | 0.08         | 0.41        | 8.39         | <b>0.70</b>  | <b>0.25</b> | <b>102</b>   | 0.07         | 0.27        | 7.26         |
| Alcohol-based surface cleaner      | 2     | 0.61         | 1.54        | 83.8         | 0.59         | 0.35        | 80.3         | 0.52         | 1.52        | 68.8         | -0.19       | 0.54        | -17.2        | -0.18        | 0.57        | -16.7        | -0.25        | 1.24        | -21.8        | <i>1.25</i>  | <i>0.64</i> | 249          | 0.94         | 0.76        | 155          |
| Chlorine-based surface cleaner     | 7     | 1.23         | 0.88        | 242          | <b>0.53</b>  | <b>0.19</b> | <b>69.4</b>  | -0.48        | 0.90        | -37.9        | <i>0.55</i> | <i>0.33</i> | <i>74.1</i>  | -0.32        | 0.34        | -27.1        | -0.43        | 0.70        | -35.0        | -0.03        | 0.43        | -2.51        | -0.40        | 0.46        | -32.8        |
| Chlorine-based skin preparation    | 9     | -0.14        | 0.80        | -13.1        | -0.15        | 0.11        | -13.7        | 1.07         | 0.80        | 191          | 0.30        | 0.29        | 34.8         | 0.42         | 0.30        | 52.2         | -0.35        | 0.64        | -29.8        | <b>0.78</b>  | <b>0.37</b> | <b>117</b>   | 0.09         | 0.42        | 9.44         |
| Chlorine-based waste treatment     | 2     | 0.14         | 1.74        | 14.6         | <b>-1.12</b> | <b>0.49</b> | <b>-67.4</b> | 1.22         | 1.74        | 239          | -0.48       | 0.66        | -38.2        | -0.43        | 0.69        | -34.8        | -0.60        | 1.37        | -45.0        | 0.43         | 0.91        | 53.8         | -1.37        | 0.91        | -74.5        |
| Detergent bathroom cleaner         | 4     | -0.38        | 1.12        | -31.7        | <i>0.75</i>  | <i>0.38</i> | <i>112</i>   | -0.52        | 1.12        | -40.8        | 0.40        | 0.40        | 49.4         | 0.37         | 0.42        | 44.9         | 1.19         | 0.89        | 228          | -0.76        | 0.51        | -53.0        | -0.41        | 0.57        | -33.7        |
| Detergent instrument cleaner       | 4     | <b>-3.50</b> | <b>1.25</b> | <b>-97.0</b> | <i>0.83</i>  | <i>0.45</i> | <i>129</i>   | 0.98         | 1.28        | 167          | -0.19       | 0.48        | -17.2        | 0.54         | 0.51        | 71.3         | <b>3.06</b>  | <b>0.99</b> | <b>2036</b>  | 0.78         | 0.64        | 117          | <b>1.90</b>  | <b>0.65</b> | <b>569</b>   |
| Detergent surface cleaner          | 4     | 0.25         | 1.24        | 27.9         | .            | .           | .            | -0.78        | 1.24        | -54.3        | <b>0.99</b> | <b>0.47</b> | <b>170</b>   | 0.22         | 0.49        | 24.1         | -0.03        | 0.97        | -2.66        | -0.28        | 0.65        | -24.0        | -0.59        | 0.65        | -44.5        |
| Ethanolamine-based floor stripper  | 13    | 0.63         | 0.79        | 88.3         | -0.04        | 0.18        | -3.82        | 1.08         | 0.81        | 196          | -0.19       | 0.31        | -17.5        | 0.20         | 0.32        | 22.3         | 0.45         | 0.62        | 57.2         | -0.02        | 0.43        | -2.46        | 0.62         | 0.43        | 86.5         |
| Ethanolamine-based glass cleaner   | 8     | -1.22        | 0.88        | -70.5        | 0.43         | 0.32        | 53.1         | 0.07         | 0.88        | 6.88         | -0.12       | 0.33        | -11.3        | 0.53         | 0.35        | 70.5         | <b>2.02</b>  | <b>0.67</b> | <b>653</b>   | -0.12        | 0.44        | -11.3        | 0.10         | 0.46        | 9.98         |
| Ethanolamine-based surface cleaner | 5     | 0.56         | 1.08        | 75.2         | -0.46        | 0.79        | -37.0        | 0.46         | 1.08        | 58.5         | 0.22        | 0.39        | 24.8         | 0.05         | 0.41        | 5.32         | <b>3.31</b>  | <b>0.79</b> | <b>2635</b>  | 0.34         | 0.50        | 40.3         | 0.65         | 0.55        | 91.0         |
| Enzyme cleaner                     | 11    | <b>-2.04</b> | <b>0.77</b> | <b>-87.1</b> | <b>0.18</b>  | <b>0.09</b> | <b>19.9</b>  | 1.01         | 0.79        | 174          | 0.22        | 0.30        | 25.1         | -0.04        | 0.31        | -3.75        | 0.55         | 0.62        | 74.1         | -0.10        | 0.40        | -9.49        | 0.18         | 0.42        | 19.6         |
| High level instrument disinfectant | 2     | -1.04        | 1.54        | -64.7        | -0.34        | 0.42        | -29.1        | 0.31         | 1.52        | 36.6         | <b>1.18</b> | <b>0.53</b> | <b>227</b>   | <b>1.52</b>  | <b>0.54</b> | <b>359</b>   | 2.17         | 1.19        | 778.4        | -0.31        | 0.68        | -26.5        | 1.38         | 0.76        | 296          |
| High level disinfectant-oxidizer   | 3     | <b>-5.34</b> | <b>1.52</b> | <b>-99.5</b> | <i>0.86</i>  | <i>0.43</i> | <i>136</i>   | -0.18        | 1.59        | -16.9        | -0.69       | 0.62        | -50.1        | -0.43        | 0.65        | -34.7        | 0.54         | 1.24        | 71.6         | -0.40        | 0.86        | -33.2        | <i>1.45</i>  | <i>0.83</i> | <i>328</i>   |
| Iodine-based skin preparation      | 4     | 0.02         | 1.16        | 1.85         | -0.27        | 0.23        | -23.7        | -0.87        | 1.15        | -58.3        | -0.60       | 0.42        | -45.1        | -0.29        | 0.44        | -25.5        | -0.18        | 0.92        | -16.1        | -0.54        | 0.55        | -41.9        | -0.14        | 0.60        | -13.3        |
| Phenolic-based surface cleaner     | 7     | 0.38         | 0.95        | 46.6         | <i>-0.35</i> | <i>0.19</i> | <i>-29.7</i> | 0.72         | 0.94        | 106          | -0.25       | 0.35        | -22.3        | <i>-0.64</i> | <i>0.36</i> | <i>-47.4</i> | <i>-1.39</i> | <i>0.74</i> | <i>-75.0</i> | 0.21         | 0.47        | 23.3         | -0.52        | 0.49        | -40.5        |
| QAC-based bathroom cleaner         | 2     | -0.39        | 2.09        | -32.5        | 0.97         | 0.58        | 163          | -0.44        | 2.12        | -35.3        | -0.78       | 0.83        | -54.2        | -0.49        | 0.86        | -38.6        | 1.93         | 1.61        | 586          | -1.40        | 1.17        | -75.4        | -0.39        | 1.13        | -32.6        |
| QAC-based floor cleaner            | 12    | 0.85         | 0.87        | 134          | 0.14         | 0.23        | 15.1         | 1.05         | 1.00        | 185          | 0.60        | 0.37        | 82.4         | 0.23         | 0.35        | 25.7         | 0.53         | 0.75        | 69.1         | 0.43         | 0.51        | 54.3         | 0.06         | 0.55        | 5.76         |
| QAC-based skin preparation         | 2     | 0.96         | 1.63        | 160          | -0.16        | 0.36        | -14.7        | 0.10         | 1.62        | 10.5         | -0.70       | 0.59        | -50.5        | -0.28        | 0.62        | -24.8        | -2.04        | 1.29        | -87.0        | 0.37         | 0.77        | 44.6         | 0.63         | 0.83        | 87.1         |
| QAC-based surface cleaner          | 27    | <b>-1.36</b> | <b>0.55</b> | <b>-74.3</b> | 0.14         | 0.16        | 14.8         | 0.31         | 0.58        | 36.5         | 0.12        | 0.22        | 12.7         | 0.07         | 0.23        | 7.08         | <b>1.71</b>  | <b>0.42</b> | <b>452</b>   | 0.10         | 0.31        | 10.9         | 0.07         | 0.31        | 7.10         |
| <b>Mobile Area</b>                 |       |              |             |              |              |             |              |              |             |              |             |             |              |              |             |              |              |             |              |              |             |              |              |             |              |
| Alcohol-based skin preparation     | 26    | 0.36         | 0.40        | 43.0         | -0.19        | 0.17        | -17.5        | 0.56         | 0.63        | 75.8         | -0.04       | 0.13        | -4.27        | 0.04         | 0.12        | 3.56         | 0.01         | 0.24        | 1.05         | <i>0.42</i>  | <i>0.24</i> | 52.5         | -0.13        | 0.19        | -11.9        |
| Alcohol-based surface cleaner      | 2     | -0.13        | 0.92        | -12.5        | 0.18         | 0.53        | 19.6         | 0.76         | 1.95        | 113          | -0.51       | 0.31        | -39.8        | -0.06        | 0.36        | -5.39        | -0.47        | 0.70        | -37.3        | 0.05         | 0.71        | 4.72         | <b>1.33</b>  | <b>0.49</b> | <b>279</b>   |
| Chlorine-based surface cleaner     | 7     | 0.34         | 0.67        | 40.7         | -0.42        | 0.30        | -34.6        | 0.16         | 1.10        | 16.9         | <b>0.44</b> | <b>0.21</b> | <b>56.0</b>  | -0.12        | 0.20        | -11.3        | 0.22         | 0.41        | 24.5         | -0.04        | 0.41        | -3.78        | 0.07         | 0.32        | 7.46         |
| Chlorine-based skin preparation    | 9     | -0.47        | 0.58        | -37.2        | 0.20         | 0.27        | 21.9         | 0.43         | 0.99        | 54.0         | <b>0.48</b> | <b>0.19</b> | <b>61.2</b>  | 0.36         | 0.18        | 42.9         | -0.59        | 0.36        | -44.5        | 0.17         | 0.37        | 18.2         | -0.07        | 0.29        | -6.42        |
| Chlorine-based waste treatment     | 2     | 0.55         | 1.98        | 72.9         | 0.04         | 0.57        | 3.88         | 1.37         | 2.07        | 292          | 0.20        | 0.51        | 22.0         | 0.00         | 0.37        | -0.04        | -0.08        | 0.80        | -7.42        | 0.82         | 0.79        | 126          | -0.55        | 0.67        | -42.5        |
| Detergent bathroom cleaner         | 4     | -0.06        | 0.73        | -5.68        | -0.01        | 0.39        | -1.18        | -0.01        | 1.41        | -0.91        | <i>0.43</i> | <i>0.24</i> | 53.0         | -0.06        | 0.26        | -5.45        | 0.52         | 0.51        | 68.9         | -0.29        | 0.52        | -25.4        | 0.19         | 0.39        | 21.1         |
| Detergent instrument cleaner       | 4     | 0.16         | 1.08        | 17.1         | -0.11        | 0.42        | -10.5        | 1.18         | 1.53        | 227          | 0.08        | 0.33        | 8.62         | <i>0.53</i>  | <i>0.27</i> | <i>70.4</i>  | <b>1.44</b>  | <b>0.57</b> | <b>323</b>   | 0.55         | 0.59        | 73.6         | <b>1.16</b>  | <b>0.47</b> | <b>217.7</b> |
| Detergent surface cleaner          | 4     | 0.45         | 1.41        | 57.5         | -0.07        | 0.41        | -6.45        | 0.25         | 1.48        | 28.3         | <b>1.31</b> | <b>0.35</b> | <b>272</b>   | 0.42         | 0.26        | 51.7         | 0.30         | 0.57        | 34.5         | 0.11         | 0.57        | 11.7         | -0.24        | 0.48        | -21.4        |
| Ethanolamine-based floor stripper  | 13    | 0.03         | 0.83        | 2.55         | <i>0.49</i>  | <i>0.26</i> | <i>63.5</i>  | 0.82         | 0.95        | 127          | -0.05       | 0.24        | -5.23        | <b>0.43</b>  | <b>0.16</b> | <b>53.8</b>  | 0.35         | 0.36        | 41.3         | -0.35        | 0.37        | -29.4        | <b>0.74</b>  | <b>0.30</b> | <b>109</b>   |
| Ethanolamine-based glass cleaner   | 8     | 0.67         | 0.74        | 94.7         | 0.18         | 0.29        | 19.7         | 0.10         | 1.06        | 10.4         | 0.28        | 0.22        | 31.7         | -0.02        | 0.19        | -2.14        | <i>0.78</i>  | <i>0.40</i> | <i>117</i>   | -0.10        | 0.40        | -9.28        | 0.09         | 0.33        | 9.03         |
| Ethanolamine-based surface cleaner | 5     | 0.31         | 0.73        | 35.9         | 0.14         | 0.37        | 14.8         | -0.01        | 1.34        | -0.81        | <b>0.62</b> | <b>0.23</b> | <b>85.3</b>  | <b>0.75</b>  | <b>0.23</b> | <b>112</b>   | <b>2.72</b>  | <b>0.40</b> | <b>1420</b>  | 0.00         | 0.50        | 0.27         | <b>1.45</b>  | <b>0.35</b> | <b>326</b>   |
| Enzyme cleaner                     | 11    | <i>-1.38</i> | <i>0.69</i> | <i>-74.9</i> | -0.34        | 0.26        | -28.9        | <i>1.81</i>  | <i>0.94</i> | 508          | -0.01       | 0.21        | -1.46        | -0.05        | 0.17        | -4.41        | -0.47        | 0.36        | -37.6        | 0.39         | 0.36        | 47.9         | <i>-0.51</i> | <i>0.29</i> | <i>-39.8</i> |
| High level instrument disinfectant | 2     | -0.50        | 0.92        | -39.4        | 0.06         | 0.53        | 6.15         | <b>4.50</b>  | <b>1.81</b> | <b>8878</b>  | 0.27        | 0.31        | 31.3         | -0.06        | 0.36        | -5.67        | -0.47        | 0.70        | -37.3        | <b>1.83</b>  | <b>0.64</b> | <b>523</b>   | -0.26        | 0.52        | -22.5        |
| High level disinfectant-oxidizer   | 3     | -1.73        | 1.93        | -82.3        | -0.54        | 0.51        | -41.9        | 1.35         | 1.84        | 285          | -0.83       | <i>0.49</i> | <i>-56.5</i> | -0.04        | 0.32        | -4.13        | -0.94        | 0.72        | -61.0        | 0.39         | 0.72        | 47.8         | -0.14        | 0.63        | -13.3        |
| Iodine-based skin preparation      | 4     | -0.33        | 0.84        | -28.1        | -0.53        | 0.39        | -41.2        | <b>-3.84</b> | <b>1.35</b> | <b>-97.9</b> | -0.39       | 0.26        | -32.3        | <b>0.66</b>  | <b>0.26</b> | <b>93.4</b>  | -0.32        | 0.53        | -27.4        | <b>-1.82</b> | <b>0.49</b> | <b>-83.7</b> | 0.05         | 0.41        | 5.64         |
| Phenolic-based surface cleaner     | 7     | -0.54        | 0.77        | -41.6        | -0.20        | 0.31        | -18.0        | 1.38         | 1.14        | 296          | 0.20        | 0.24        | 21.6         | -0.10        | 0.20        | -9.48        | -0.03        | 0.43        | -2.92        | 0.47         | 0.43        | 59.6         | -0.25        | 0.35        | -22.3        |
| QAC-based bathroom cleaner         | 2     | 0.68         | 2.71        | 97.9         | 0.89         | 0.66        | 143          | -0.23        | 2.41        | -20.4        | 0.41        | 0.69        | 50.2         | 0.40         | 0.40        | 48.8         | 1.15         | 0.96        | 216          | -1.30        | 0.95        | -72.9        | -0.16        | 0.85        | -14.4        |
| QAC-based floor cleaner            | 12    | 0.81         | 0.90        | 124          | 0.19         | 0.31        | 21.5         | 1.36         | 1.14        | 289          | 0.18        | 0.28        | 20.1         | -0.24        | 0.17        | -21.1        | -0.16        | 0.42        | -15.2        | <i>0.83</i>  | <i>0.45</i> | 128          | -0.33        | 0.34        | -28.1        |
| QAC-based skin preparation         | 2     | 1.08         | 1.18        | 195          | 0.69         | 0.55        | 99.8         | -0.16        | 2.01        | -14.6        | -0.33       | 0.38        | -28.2        | 0.00         | 0.37        | 0.00         | -0.13        | 0.74        | -12.3        | 0.28         | 0.75        | 32.7         | 0.69         | 0.58        | 99.4         |
| QAC-based surface cleaner          | 27    | 0.26         | 0.68        | 29.2         | -0.04        | 0.19        | -3.54        | 0.52         | 0.67        | 68.1         | 0.29        | 0.18        | 33.2         | 0.05         | 0.12        | 4.73         | <b>0.69</b>  | <b>0.26</b> | <b>100</b>   | 0.06         | 0.26        | 6.30         | 0.06         | 0.22        | 6.65         |

VOC, volatile organic compound; TVOC14, sum of total 14 VOCs; TVOC11, sum of 11 VOCs (excluding three most dominant compounds: ethanol, acetone and 2-propanol); β, regression model estimate; SE, standard error; % Δ, percentage change was estimated by the following equation: (exp(β)-1)\*100%; p-value <0.05 shown in bold, 0.05 < p-value <0.1 shown in italics.

\*, the models used indicator variables (≥15 minutes; reference group: <15 minutes) to estimate VOC exposures.

The linear mixed-effect models had random effects of hospital and participants nested within hospitals, and also included bystander cleaning tasks and product-use.

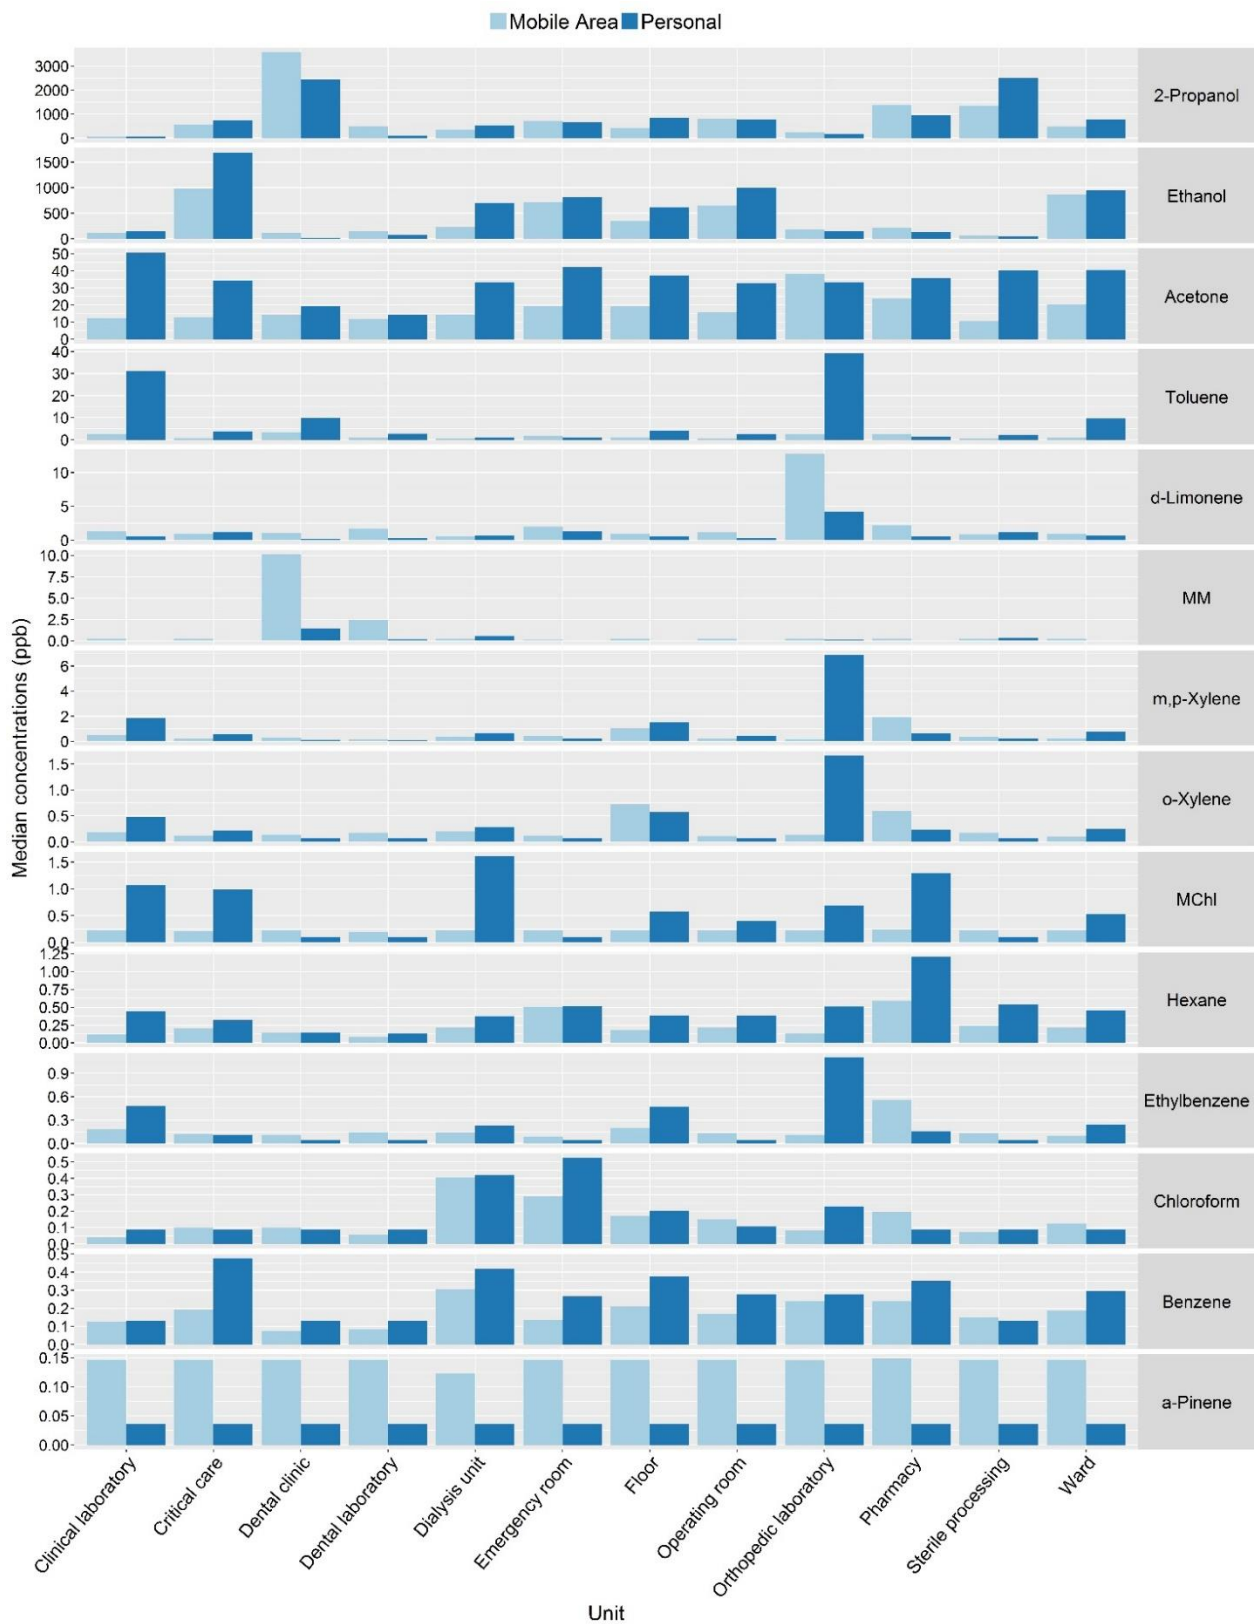

Supplemental Figure 1. Median concentrations in parts per billion for personal and mobile-area VOCs by hospital unit.

VOC, volatile organic compound; MChI, methylene chloride; MM, methyl methacrylate. Note: Scale is different for each chemical, and chemicals arranged in a descending order of concentration range.
